# Supplementary material for: Bacterial chemotaxis in static gradients quantified in a biopolymer membrane-integrated microfluidic platform
Source: Royal Society of Chemistry journal article supplement (doi:10.1039/d2lc00481j), 2022-01-01
Supplement: d2lc00481j1.pdf [file d2lc00481j1.pdf]

## Lab on a Chip Supplementary Information

### Adhesion-free bacterial chemotaxis in static gradients quantified in a biopolymer membrane-integrated microfluidic platform

Piao Hu,<sup>a</sup> Khanh Ly,<sup>b</sup> Le P. H. Pham,<sup>a</sup> Alex E. Pottash,<sup>c</sup> Kathleen Sheridan,<sup>b</sup> Hsuan-Chen Wu,<sup>d†</sup> Chen-Yu Tsao,<sup>d</sup> David Quan,<sup>d‡</sup> William E. Bentley,<sup>c,d</sup> Gary W. Rubloff, Herman O. Sintim<sup>f</sup> and Xiaolong Luo<sup>a\*</sup>

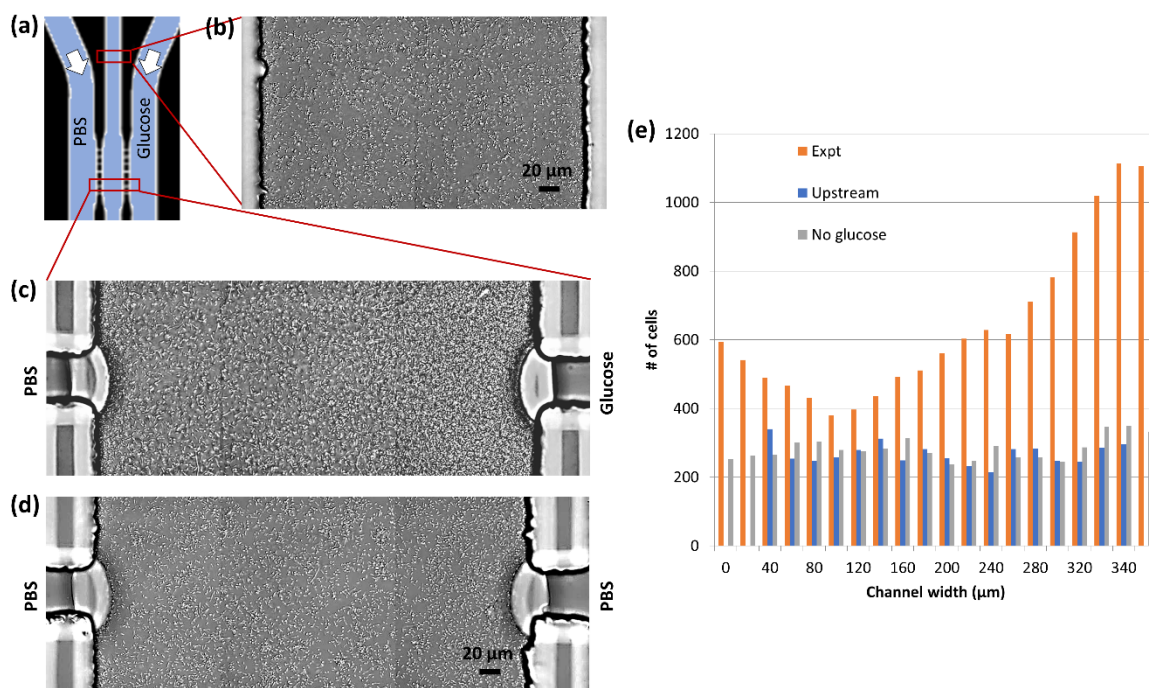

**Figure S1.** Control experiments of *E. coli* chemotaxis to glucose. **(a)** Schematic of regions of interest for control and experimental cell distributions after establishing static glucose gradients for 30 min. **(b)** Cell distribution at the upstream of the middle channel (control\_1). **(c)** Cell distribution with static glucose gradients for 30 min (experiment). **(d)** Cell distribution without static glucose gradients (control\_2). **(e)** Particle counting analysis of the experiment and controls.

## **Legends for Supplementary Videos**

**Supplementary video 1:** The real-time chemotactic migration of *E. coli* cells in the middle channel under steady gradient of glucose for 30 minutes. The concentration of glucose was from 0 to 1 mM from left edge to right edge. *E. coli* cells was suspended in PBS and the OD of *E. coli* cells was 0.97.

**Supplementary video 2:** The chemotaxis process of green fluorescence protein (GFP)-expressing *E. coli* cells in static glucose gradient for 30 minutes. The left channel was filled with constant flow of PBS while the right channel was filled with constant flow of 1 mM glucose. GFP-expressing *E. coli* cells was suspended in PBS and the OD of *E. coli* cells was 1.35. Fluorescent image was taken every 30 seconds to avoid photobleaching.
